# Supplementary material
Source: PubMed Central journal article supplement (PMC3510855)
Supplement: prio-6-461-s01.pdf [file prio-6-461-s01.pdf]

## **Supplemental Material to:**

**Jennifer M. Thomson, Victoria Bowles, Jung-Woo Choi,  
Urmila Basu, Yan Meng, Paul. Stothard and Stephen Moore**

**The identification of candidate genes and SNP markers for  
classical bovine spongiform encephalopathy susceptibility**

**Prion 2013; 7(1)**

**<http://dx.doi.org/10.4161/pri.21866>**

**<http://www.landesbioscience.com/journals/prion/article/21866/>**







|          |    |           |                          |   |   |   |   |   |   |   |   |   |   |   |   |
|----------|----|-----------|--------------------------|---|---|---|---|---|---|---|---|---|---|---|---|
| LGT7313  | 1  | 90115830  | 5 3PRIME_UTR             | 0 | 1 | 1 | 1 | 1 | 0 | 0 | 0 | 0 | 1 | 0 | 0 |
| LGT7314  | 1  | 90208886  | 1 gene/intron            | 0 | 0 | 0 | 0 | 0 | 0 | 0 | 0 | 0 | 1 | 0 | 0 |
| LGT7315  | 1  | 90221618  | 1 gene/intron            | 0 | 0 | 0 | 1 | 0 | 0 | 0 | 0 | 0 | 0 | 0 | 0 |
| LGT7316  | 5  | 66199816  | 1 INTERGENIC             | 0 | 0 | 0 | 0 | 1 | 0 | 0 | 0 | 0 | 0 | 0 | 0 |
| LGT7317  | 5  | 66398195  | 1 INTERGENIC             | 0 | 0 | 0 | 0 | 1 | 0 | 0 | 0 | 0 | 0 | 0 | 0 |
| LGT7318  | 5  | 66601881  | 1 INTERGENIC             | 0 | 0 | 0 | 0 | 1 | 0 | 0 | 0 | 0 | 0 | 0 | 0 |
| LGT7319  | 5  | 66801321  | 2 UPSTREAM               | 0 | 1 | 0 | 0 | 1 | 0 | 0 | 0 | 0 | 0 | 0 | 0 |
| LGT7321  | 5  | 112300173 | 1 INTRONIC               | 0 | 0 | 0 | 0 | 1 | 0 | 0 | 0 | 0 | 0 | 0 | 0 |
| LGT7322  | 5  | 112390150 | 3 3PRIME_UTR             | 0 | 0 | 0 | 0 | 1 | 0 | 1 | 0 | 0 | 0 | 0 | 0 |
| LGT7323  | 5  | 112639619 | 1 SYNONYMOUS_CODING      | 0 | 0 | 0 | 0 | 1 | 0 | 0 | 0 | 0 | 0 | 0 | 1 |
| LGT7324  | 5  | 112796763 | 1 INTERGENIC             | 0 | 0 | 0 | 0 | 1 | 0 | 0 | 0 | 0 | 0 | 0 | 0 |
| LGT7325  | 5  | 113103674 | 1 INTRONIC               | 0 | 0 | 0 | 0 | 1 | 0 | 0 | 0 | 0 | 0 | 0 | 0 |
| LGT7326  | 5  | 113201695 | 2 INTRONIC               | 0 | 1 | 0 | 0 | 1 | 0 | 0 | 0 | 0 | 0 | 0 | 0 |
| LGT7327  | 5  | 113291519 | 2 INTERGENIC             | 0 | 1 | 0 | 0 | 1 | 0 | 0 | 0 | 0 | 0 | 0 | 0 |
| LGT7328  | 10 | 47743503  | 9 NON_SYNONYMOUS_CODING  | 1 | 1 | 0 | 0 | 1 | 1 | 1 | 1 | 1 | 1 | 1 | 1 |
| LGT7329  | 10 | 47634172  | 1 NON_SYNONYMOUS_CODING  | 1 | 0 | 0 | 0 | 0 | 0 | 0 | 0 | 0 | 0 | 0 | 0 |
| LGT7330  | 10 | 48100723  | 1 INTRONIC               | 0 | 0 | 0 | 0 | 1 | 0 | 0 | 0 | 0 | 0 | 0 | 0 |
| LGT7331  | 10 | 48278737  | 2 DOWNSTREAM             | 1 | 0 | 0 | 0 | 1 | 0 | 0 | 0 | 0 | 0 | 0 | 0 |
| LGT7331a | 10 | 48274239  | 1 UPSTREAM               | 1 | 0 | 0 | 0 | 0 | 0 | 0 | 0 | 0 | 0 | 0 | 0 |
| LGT7332  | 10 | 48501473  | 3 synonymous             | 0 | 0 | 1 | 1 | 0 | 0 | 0 | 0 | 0 | 1 | 0 | 0 |
| LGT7333  | 19 | 61868149  | 1 intergenic             | 0 | 1 | 0 | 1 | 0 | 0 | 0 | 0 | 0 | 0 | 0 | 0 |
| LGT7334  | 19 | 62519808  | 1 3'UTR                  | 0 | 0 | 1 | 0 | 0 | 0 | 0 | 0 | 0 | 0 | 0 | 0 |
| LGT7335  | 19 | 62522459  | 2 5'UTR                  | 0 | 0 | 1 | 1 | 0 | 0 | 0 | 0 | 0 | 0 | 0 | 0 |
| LGT7336  | 19 | 62558602  | 0                        | 0 | 0 | 0 | 0 | 0 | 0 | 0 | 0 | 0 | 0 | 0 | 0 |
| LGT7337  | 19 | 63032103  | 2 intergenic             | 0 | 0 | 1 | 1 | 0 | 0 | 0 | 0 | 0 | 0 | 0 | 0 |
| LGT7338  | X  | 85001920  | 1 INTERGENIC             | 0 | 0 | 0 | 0 | 1 | 0 | 0 | 0 | 0 | 0 | 0 | 0 |
| LGT7339  | X  | 85195447  | 4 3PRIME_UTR             | 0 | 0 | 0 | 0 | 0 | 1 | 1 | 1 | 1 | 1 | 1 | 1 |
| LGT7340  | X  | 85461934  | 1 NON_SYNONYMOUS_CODING  | 0 | 0 | 0 | 0 | 0 | 0 | 1 | 0 | 0 | 0 | 0 | 0 |
| LGT7341  | X  | 85599131  | 1 UPSTREAM               | 0 | 1 | 0 | 0 | 0 | 0 | 0 | 0 | 0 | 0 | 0 | 0 |
| LGT7342  | X  | 85757495  | 1 NON_SYNONYMOUS_CODING  | 0 | 1 | 0 | 0 | 0 | 0 | 0 | 0 | 0 | 0 | 0 | 0 |
| LGT7343  | X  | 85973984  | 1 NON_SYNONYMOUS_CODING  | 0 | 1 | 0 | 0 | 0 | 1 | 0 | 0 | 0 | 0 | 0 | 0 |
| LGT7344  | 1  | 28652646  | 2 INTERGENIC             | 0 | 1 | 0 | 0 | 0 | 0 | 0 | 0 | 0 | 1 | 0 | 0 |
| LGT7345  | 1  | 28846772  | 1 INTERGENIC             | 0 | 0 | 0 | 0 | 0 | 0 | 0 | 0 | 0 | 0 | 0 | 0 |
| LGT7346  | 1  | 29046167  | 1 INTERGENIC             | 0 | 1 | 0 | 0 | 0 | 0 | 0 | 0 | 0 | 0 | 0 | 0 |
| LGT7347  | 1  | 29245694  | 2 INTERGENIC             | 0 | 1 | 0 | 0 | 1 | 0 | 0 | 0 | 0 | 0 | 0 | 0 |
| LGT7348  | 1  | 29342853  | 1 SYNONYMOUS_CODING      | 0 | 1 | 0 | 0 | 0 | 0 | 0 | 0 | 0 | 0 | 0 | 0 |
| LGT7349  | 1  | 29546666  | 10 SYNONYMOUS_CODING     | 1 | 1 | 1 | 1 | 1 | 1 | 1 | 1 | 1 | 0 | 0 | 1 |
| LGT7350  | 1  | 29642496  | 2 INTERGENIC             | 0 | 1 | 0 | 0 | 1 | 0 | 0 | 0 | 0 | 0 | 0 | 0 |
| LGT7351  | 2  | 108157384 | 1 INTERGENIC             | 0 | 0 | 0 | 0 | 1 | 0 | 0 | 0 | 0 | 0 | 0 | 0 |
| LGT7352  | 2  | 108379546 | 1 INTERGENIC             | 0 | 1 | 0 | 0 | 0 | 0 | 0 | 0 | 0 | 0 | 0 | 0 |
| LGT7353  | 2  | 108616181 | 9 NON_SYNONYMOUS_CODING  | 1 | 1 | 0 | 0 | 1 | 1 | 1 | 1 | 1 | 1 | 1 | 1 |
| LGT7354  | 2  | 108682068 | 5 NON_SYNONYMOUS_CODING  | 1 | 0 | 0 | 0 | 0 | 1 | 0 | 0 | 0 | 0 | 0 | 1 |
| LGT7355  | 2  | 108836863 | 1 NON_SYNONYMOUS_CODING  | 0 | 0 | 0 | 0 | 0 | 1 | 0 | 0 | 0 | 0 | 0 | 0 |
| LGT7356  | 2  | 108854292 | 9 NON_SYNONYMOUS_CODING  | 1 | 1 | 0 | 0 | 1 | 1 | 1 | 1 | 1 | 1 | 1 | 1 |
| LGT7357  | 3  | 31943796  | 7 SYNONYMOUS_CODING      | 0 | 0 | 1 | 0 | 0 | 0 | 1 | 1 | 1 | 1 | 1 | 1 |
| LGT7358  | 3  | 31958499  | 1 INTRONIC               | 0 | 1 | 0 | 0 | 0 | 0 | 0 | 0 | 0 | 0 | 0 | 0 |
| LGT7359  | 3  | 32049120  | 1 INTRONIC               | 0 | 1 | 0 | 0 | 0 | 0 | 0 | 0 | 0 | 0 | 0 | 0 |
| LGT7360  | 3  | 32139727  | 11 NON_SYNONYMOUS_CODING | 1 | 1 | 1 | 1 | 1 | 1 | 1 | 1 | 1 | 1 | 1 | 1 |
| LGT7361  | 3  | 32165127  | 4 NON_SYNONYMOUS_CODING  | 1 | 0 | 0 | 0 | 1 | 0 | 1 | 0 | 0 | 0 | 0 | 0 |
| LGT7362  | 3  | 32625419  | 1 NON_SYNONYMOUS_CODING  | 0 | 0 | 0 | 0 | 0 | 0 | 1 | 0 | 0 | 0 | 0 | 0 |
| LGT7363  | 3  | 32625544  | 1 NON_SYNONYMOUS_CODING  | 0 | 0 | 0 | 0 | 1 | 0 | 0 | 0 | 0 | 0 | 0 | 0 |
| LGT7364  | 3  | 32668316  | 1 NON_SYNONYMOUS_CODING  | 0 | 1 | 0 | 0 | 0 | 0 | 0 | 0 | 0 | 0 | 0 | 0 |
| LGT7365  | 3  | 3286447   | 0                        | 0 | 0 | 0 | 0 | 0 | 0 | 0 | 0 | 0 | 0 | 0 | 0 |
| LGT7366  | 5  | 7928995   | 3 NON_SYNONYMOUS_CODING  | 0 | 1 | 0 | 0 | 1 | 0 | 0 | 0 | 0 | 0 | 0 | 0 |
| LGT7367  | 5  | 8175107   | 1 NON_SYNONYMOUS_CODING  | 0 | 0 | 0 | 0 | 0 | 0 | 1 | 0 | 0 | 0 | 0 | 0 |
| LGT7368  | 5  | 8363296   | 1 INTERGENIC             | 0 | 0 | 0 | 0 | 1 | 0 | 0 | 0 | 0 | 0 | 0 | 0 |
| LGT7369  | 5  | 8562180   | 2 INTERGENIC             | 0 | 1 | 0 | 0 | 1 | 0 | 0 | 0 | 0 | 0 | 0 | 0 |
| LGT7370  | 5  | 8764261   | 2 INTERGENIC             | 0 | 1 | 0 | 0 | 1 | 0 | 0 | 0 | 0 | 0 | 0 | 0 |
| LGT7371  | 5  | 8862511   | 1 INTERGENIC             | 0 | 0 | 0 | 0 | 1 | 0 | 0 | 0 | 0 | 0 | 0 | 0 |
| LGT7372  | 10 | 28795811  | 1 INTERGENIC             | 0 | 0 | 0 | 0 | 1 | 0 | 0 | 0 | 0 | 0 | 0 | 0 |
| LGT7373  | 10 | 28913165  | 3 NON_SYNONYMOUS_CODING  | 1 | 0 | 0 | 0 | 0 | 1 | 0 | 0 | 0 | 0 | 0 | 1 |
| LGT7374  | 10 | 29114306  | 5 SYNONYMOUS_CODING      | 0 | 1 | 0 | 0 | 1 | 0 | 1 | 1 | 1 | 1 | 1 | 0 |
| LGT7375  | 10 | 29247039  | 2 INTRONIC               | 0 | 1 | 0 | 0 | 1 | 0 | 0 | 0 | 0 | 0 | 0 | 0 |
| LGT7376  | 10 | 29444973  | 4 INTERGENIC             | 0 | 0 | 0 | 1 | 1 | 0 | 0 | 0 | 1 | 0 | 0 | 0 |
| LGT7377  | 10 | 29536019  | 2 INTRONIC               | 0 | 1 | 0 | 0 | 1 | 0 | 0 | 0 | 0 | 0 | 0 | 0 |
| LGT7378  | 10 | 29566801  | 7 3PRIME_UTR             | 0 | 0 | 0 | 1 | 1 | 1 | 1 | 1 | 1 | 0 | 0 | 1 |
| LGT7379  | 10 | 29642238  | 0                        | 0 | 0 | 0 | 0 | 0 | 0 | 0 | 0 | 0 | 0 | 0 | 0 |
| LGT7380  | 10 | 29744976  | 1 INTERGENIC             | 0 | 1 | 0 | 0 | 0 | 0 | 0 | 0 | 0 | 0 | 0 | 0 |
| LGT7381  | 14 | 44674558  | 1 INTERGENIC             | 0 | 0 | 0 | 0 | 1 | 0 | 0 | 0 | 0 | 0 | 0 | 0 |
| LGT7382  | 14 | 44893619  | 5 3PRIME_UTR             | 0 | 0 | 0 | 0 | 1 | 1 | 1 | 1 | 0 | 0 | 0 | 1 |
| LGT7383  | 14 | 45045809  | 3 NON_SYNONYMOUS_CODING  | 0 | 0 | 0 | 0 | 0 | 0 | 1 | 0 | 0 | 1 | 0 | 1 |
| LGT7384  | 14 | 45247298  | 0                        | 0 | 0 | 0 | 0 | 0 | 0 | 0 | 0 | 0 | 0 | 0 | 0 |
| LGT7385  | 14 | 45469358  | 2 INTERGENIC             | 0 | 1 | 0 | 0 | 1 | 0 | 0 | 0 | 0 | 0 | 0 | 0 |
| LGT7386  | 14 | 45669021  | 1 INTERGENIC             | 0 | 0 | 0 | 0 | 1 | 0 | 0 | 0 | 0 | 0 | 0 | 0 |
| LGT7387  | 17 | 40460535  | 1 INTERGENIC             | 0 | 0 | 0 | 0 | 1 | 0 | 0 | 0 | 0 | 0 | 0 | 0 |
| LGT7388  | 17 | 40657770  | 1 INTERGENIC             | 0 | 1 | 0 | 0 | 0 | 0 | 0 | 0 | 0 | 0 | 0 | 0 |
| LGT7389  | 17 | 40886380  | 1 INTERGENIC             | 0 | 0 | 0 | 0 | 1 | 0 | 0 | 0 | 0 | 0 | 0 | 0 |
| LGT7390  | 17 | 41058386  | 1 INTERGENIC             | 0 | 0 | 0 | 0 | 1 | 0 | 0 | 0 | 0 | 0 | 0 | 0 |
| LGT7391  | 17 | 41258734  | 2 INTERGENIC             | 0 | 1 | 0 | 0 | 1 | 0 | 0 | 0 | 0 | 0 | 0 | 0 |
| LGT7392  | 17 | 41455808  | 2 INTERGENIC             | 0 | 1 | 0 | 0 | 1 | 0 | 0 | 0 | 0 | 0 | 0 | 0 |
| LGT7393  | 24 | 1003439   | 2 INTERGENIC             | 0 | 1 | 0 | 0 | 1 | 0 | 0 | 0 | 0 | 0 | 0 | 0 |
| LGT7394  | 24 | 1190840   | 1 INTERGENIC             | 0 | 1 | 0 | 0 | 0 | 0 | 0 | 0 | 0 | 0 | 0 | 0 |
| LGT7395  | 24 | 1392567   | 1 INTERGENIC             | 0 | 0 | 0 | 0 | 1 | 0 | 0 | 0 | 0 | 0 | 0 | 0 |
| LGT7396  | 24 | 1590712   | 1 INTERGENIC             | 0 | 1 | 0 | 0 | 0 | 0 | 0 | 0 | 0 | 0 | 0 | 0 |
| LGT7397  | 24 | 1791775   | 1 INTERGENIC             | 0 | 1 | 0 | 0 | 1 | 0 | 0 | 0 | 0 | 0 | 0 | 0 |
| LGT7398  | 24 | 1945684   | 1 INTRONIC               | 0 | 1 | 0 | 0 | 0 | 0 | 0 | 0 | 0 | 0 | 0 | 0 |
| LGT7399  | 24 | 1990853   | 2 INTERGENIC             | 0 | 1 | 0 | 0 | 1 | 0 | 0 | 0 | 0 | 0 | 0 | 0 |
